# Supplementary material
Source: publisher site journal article supplement (https://www.dovepress.com/article/466292)
Supplement: Supplementary file 1 [file get_supplementary_file.php]

---

Table S1 Correlation analysis of CT value between T10-T12 and L1

|                          | Index (r) | P         |
|--------------------------|-----------|-----------|
| T10&L1                   | 0.926     | < 0.001** |
| T11&L1                   | 0.945     | < 0.001** |
| T12&L1                   | 0.979     | < 0.001** |
| Mean value of T10-T12&L1 | 0.964     | < 0.001** |

\*\* ,  $p < 0.01$

---

Table S2 Correlation analysis between T10-L1 CT value and T value of lumbar bone density-

---

|                       | r     | P        |
|-----------------------|-------|----------|
| T10                   | 0.632 | <0.001** |
| T11                   | 0.573 | <0.001** |
| T12                   | 0.553 | <0.001** |
| L1                    | 0.571 | <0.001** |
| T10-T12 mean CT value | 0.597 | <0.001** |
| T10-L1 mean CT value  | 0.593 | <0.001** |

---

\*\* ,  $p < 0.01$

---

Table S3 ROC curve of CT value in vertebral bodies

|                 | ROC area | Sensitivity | specificity | index | CT value |
|-----------------|----------|-------------|-------------|-------|----------|
| T10             | 0.913    | 90.5        | 84.5        | 0.755 | 151      |
| T11             | 0.887    | 90.5        | 80.0        | 0.705 | 138      |
| T12             | 0.863    | 81.0        | 83.3        | 0.643 | 132      |
| L1              | 0.860    | 76.2        | 86.4        | 0.695 | 133      |
| Mean of T10-T12 | 0.894    | 81.0        | 86.7        | 0.676 | 142      |
| Mean of T10-L1  | 0.890    | 81.0        | 88.3        | 0.693 | 138      |

---

Table S4 CT value compared with DXA in the diagnosis of bone mass abnormality

---

|          |       | DXA |    | total |
|----------|-------|-----|----|-------|
|          |       | +   | -  |       |
| CT value | +     | 50  | 3  | 53    |
|          | -     | 9   | 19 | 28    |
|          | total | 59  | 22 | 81    |

---

Table S5 Comparison of area under ROC curve between different vertebral bodies

|                          | Area under ROC | 95% confidence interval | Z value | P      |
|--------------------------|----------------|-------------------------|---------|--------|
| T10 and T11              | 0.029          | -0.009 - 0.066          | 1.510   | 0.131  |
| T10 and T12              | 0.052          | 0.001 - 0.102           | 2.004   | 0.045* |
| T10 and L1               | 0.055          | -0.006 - 0.116          | 1.761   | 0.078  |
| T10 and mean T10-<br>T12 | 0.019          | -0.007- 0.046           | 1.426   | 0.154  |
| T10and mean T10-L1       | 0.024          | -0.006 - 0.053          | 1.587   | 0.113  |

\*,  $p < 0.05$

Table S6 BMD normal group VS BMD reduced group

| factor                                  | t/z    | P       |
|-----------------------------------------|--------|---------|
| age(year)                               | 1.072  | 0.290   |
| COPD history(year)                      | -0.960 | 0.337   |
| long-term inhaled corticosteroids, n(%) | 1.467  | 0.226   |
| mMRC                                    | -2.049 | 0.040*  |
| Weight (kg)                             | -1.822 | 0.068   |
| BMI(kg/m <sup>2</sup> )                 | -3.639 | 0.001** |
| PaO <sub>2</sub> (mmHg)                 | 1.666  | 0.103   |
| SaO <sub>2</sub> (%)                    | -1.078 | 0.281   |
| Ca (mmol/L)                             | -2.103 | 0.035*  |
| 25-hydroxyvitamin D3 (ng/mL)            | -0.657 | 0.511   |
| FEV <sub>1</sub> (L)                    | -1.444 | 0.149   |
| FEV <sub>1</sub> %(%)                   | -1.01  | 0.313   |
| FVC(L)                                  | -1.409 | 0.159   |

\*\* ,  $p < 0.01$ , \* ,  $p < 0.05$

Table S7 BMD normal group VS osteoporosis group

| factor                                   | t/z    | P       |
|------------------------------------------|--------|---------|
| age(year)                                | 2.967  | 0.004** |
| COPD history(year)                       | -3.204 | 0.001** |
| long-term inhaled corticosteroids, n(%)  | 6.496  | 0.011*  |
| mMRC                                     | -3.072 | 0.002** |
| Weight (kg)                              | -3.452 | 0.001** |
| BMI(kg/m <sup>2</sup> )                  | -4.413 | 0.001** |
| PaO <sub>2</sub> (mmHg)                  | 2.630  | 0.011*  |
| SaO <sub>2</sub> (%)                     | -2.721 | 0.007** |
| Ca (mmol/L)                              | -3.929 | 0.001** |
| 25-hydroxyvitamin D <sub>3</sub> (ng/mL) | -2.438 | 0.015** |
| FEV <sub>1</sub> (L)                     | -2.901 | 0.004** |
| FEV <sub>1</sub> %(%)                    | -2.588 | 0.010** |
| FVC(L)                                   | -2.508 | 0.012*  |

\*\* ,  $p < 0.01$ , \* ,  $p < 0.05$

Table S8 BMD reduced group VS osteoporosis group

| factor                                  | t/z    | P     |
|-----------------------------------------|--------|-------|
| age(year)                               | 1.403  | 0.166 |
| COPD history(year)                      | -1.702 | 0.089 |
| long-term inhaled corticosteroids, n(%) | 1.488  | 0.223 |
| mMRC                                    | -1.247 | 0.212 |
| Weight (kg)                             | -1.468 | 0.142 |
| BMI(kg/m2)                              | -1.191 | 0.234 |
| PaO2(mmHg)                              | 0.927  | 0.358 |
| SaO2(%)                                 | -1.549 | 0.121 |
| Ca (mmol/L)                             | -0.706 | 0.481 |
| 25-hydroxyvitamin D3 (ng/mL)            | -1.819 | 0.069 |
| FEV1(L)                                 | -1.145 | 0.252 |
| FEV1%(%)                                | -1.137 | 0.255 |
| FVC(L)                                  | -1.027 | 0.304 |



TableS9 Assignment instructions

---

| Factor                                   | name | Assignment             |
|------------------------------------------|------|------------------------|
| age(year)                                | X1   | CV                     |
| COPD history(year)                       | X2   | CV                     |
| long-term inhaled corticosteroids, n(%)  | X3   | negative-1, positive-2 |
| mMRC                                     | X4   | CV                     |
| Weight (kg)                              | X5   | CV                     |
| BMI(kg/m <sup>2</sup> )                  | X6   | CV                     |
| PaO <sub>2</sub> (mmHg)                  | X7   | CV                     |
| SaO <sub>2</sub> (%)                     | X8   | CV                     |
| Ca (mmol/L)                              | X9   | CV                     |
| 25-hydroxyvitamin D <sub>3</sub> (ng/mL) | X10  | CV                     |
| FEV <sub>1</sub> (L)                     | X11  | CV                     |
| FEV <sub>1</sub> %(%)                    | X12  | CV                     |
| FVC(L)                                   | X13  | CV                     |
| BMD                                      | Y    | OCV                    |

---

CV, continuous variable

OCV, ordered categorical variable

---

Table S10 Correlation between IL-6 and bone metabolic factor

| Factor          | r      | P      |
|-----------------|--------|--------|
| ALP             | -0.15  | 0.897  |
| TPINP           | 0.049  | 0.662  |
| N-OST           | -0.014 | 0.903  |
| $\beta$ -crossl | -0.254 | 0.022* |

*\*, p < 0.05*

---

Table S11 Correlation between TNF- $\alpha$  and bone metabolic factor

| Factor          | r     | P      |
|-----------------|-------|--------|
| ALP             | 0.284 | 0.023* |
| TPINP           | -0.11 | 0.930  |
| N-OST           | 0.003 | 0.979  |
| $\beta$ -crossl | 0.110 | 0.389  |

\*,  $p < 0.05$
